# Supplementary material
Source: PubMed Central journal article supplement (PMC3234941)
Supplement: supp_M111.298463_jbc.M111.298463-1.pdf [file supp_M111.298463_jbc.M111.298463-1.pdf]

A Distinct Mechanism for Coactivator versus Corepressor Function by Histone Methyltransferase G9a in Transcriptional Regulation\*

**Daniel J. Purcell, Kwang Won Jeong, Danielle Bittencourt, Daniel S. Gerke, and Michael R. Stallcup**

From the Department of Biochemistry and Molecular Biology, Norris Comprehensive Cancer Center, University of Southern California, Los Angeles CA 90089-9176

### **SUPPLEMENTARY INFORMATION**

**SUPPLEMENTARY FIGURE 1. G9a affects ER $\alpha$  target gene expression at the level of transcription.**

**SUPPLEMENTARY FIGURE 2. Enhancement of E2-dependent reporter gene expression by G9a and G9a protein fragments in cooperation with GRIP1 and CARM1.**

**SUPPLEMENTARY FIGURE 3. Amino acid homology of the N-terminal regions of mouse and human G9a.**

**SUPPLEMENTARY FIGURE 4. Coactivator activity of the N-terminal region of hG9a.**

**SUPPLEMENTARY FIGURE 5. Binding of G9a to various domains of ER $\alpha$ .**

**SUPPLEMENTARY TABLE 1. Primers for PCR.**

**SUPPLEMENTARY REFERENCES**

# Supplementary Figure 1

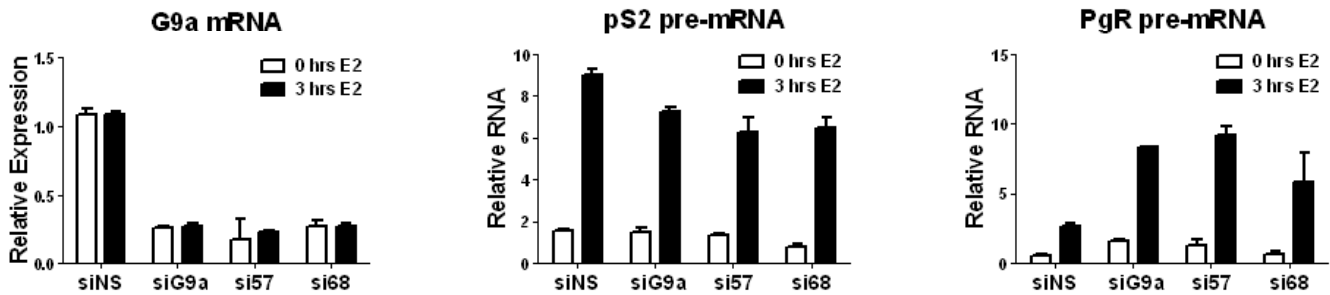

**SUPPLEMENTARY FIGURE 1. G9a affects ER $\alpha$  target gene expression at the level of transcription.** The SMARTpool siRNA against G9a (e.g. Fig. 1) is composed of four siRNAs that target G9a, designated by Dharmacon as #5, #6, #7, and #8. In this experiment MCF-7 cells were transfected with pairs of these siRNAs, either #5 plus #7 (si57) or #6 plus #8 (si68), or with siNS. Transfected cells were cultured for three days in hormone-free medium prior to addition of 100 nM E2 for the indicated time. Total RNA samples were analyzed by qRT-PCR, using primers designed to detect pS2, GREB1, and PgR pre-mRNA, as illustrated in Fig. 2A. Results are presented relative to GAPDH mRNA levels as the mean and SD for three PCR reactions performed with the cDNA samples from a single experiment, and are representative of two independent biological experiments performed on different days.

## Supplementary Figure 2

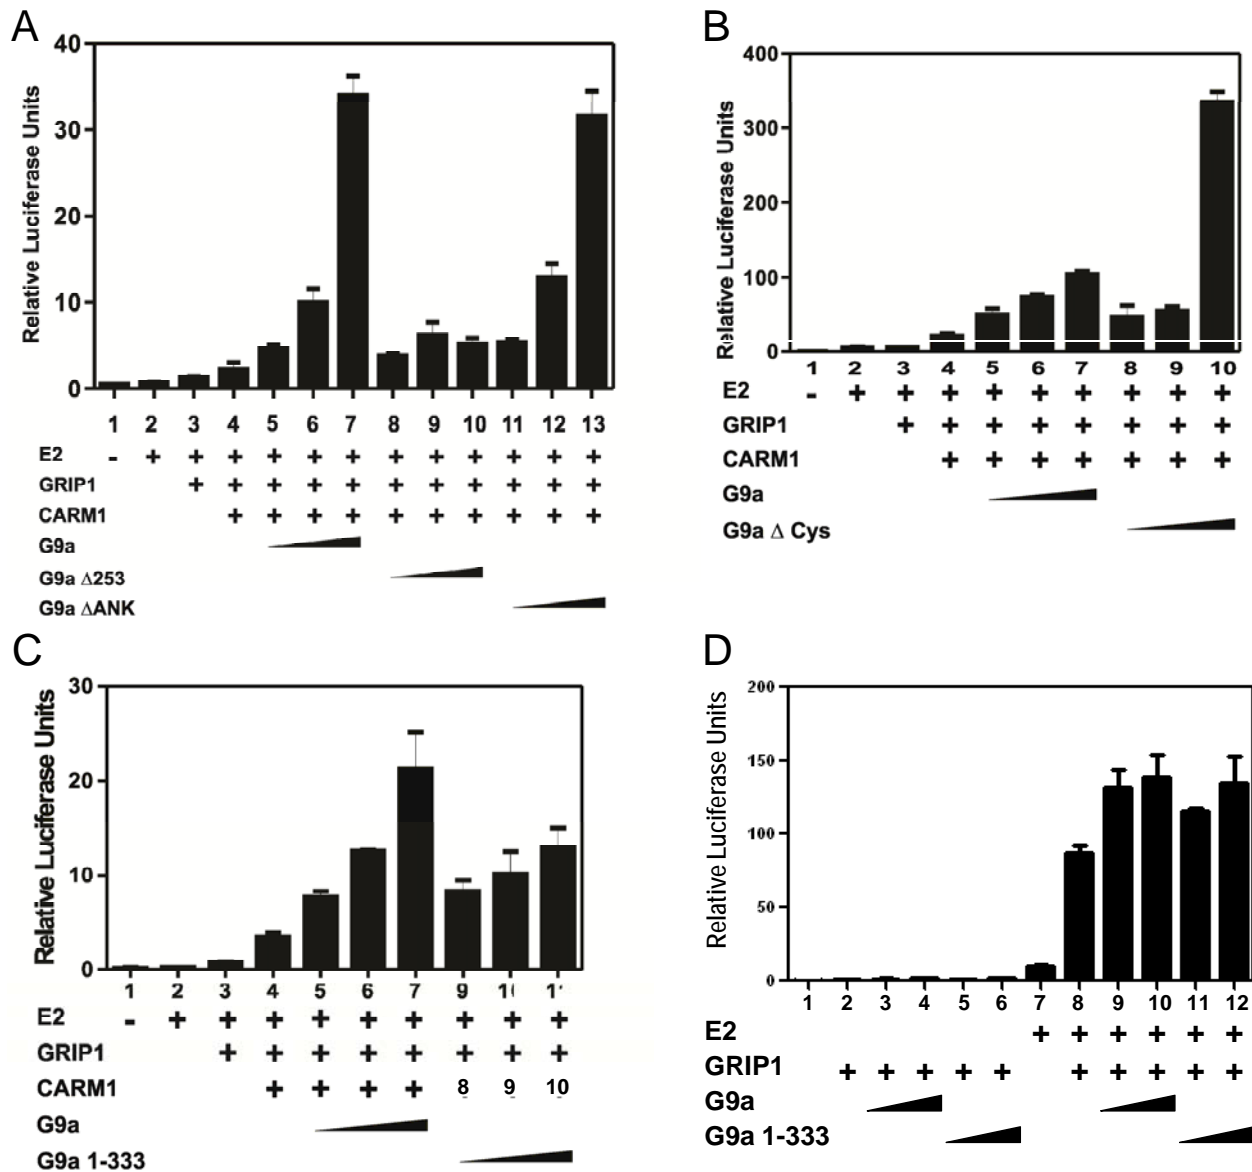

**SUPPLEMENTARY FIGURE 2. Enhancement of E2-dependent reporter gene expression by G9a and G9a protein fragments in cooperation with GRIP1 and CARM1.** A-C, CV-1 cells in 12-well dishes were transfected with MMTV(ERE) LUC reporter plasmid (200 ng) and expression vectors encoding ER $\alpha$  (0.02 ng); GRIP1 (100 ng); CARM1 (200 ng); HA-tagged mG9a full length (FL), mG9a $\Delta$ 252, mG9a $\Delta$ ANK, and mG9a $\Delta$ Cys (100, 200 or 400 ng); and mG9a 1-333 (50, 100, or 200 ng) as indicated. Cells were grown in the presence or absence of E2 for 48 h before measurement of luciferase activity and immunoblot analysis with antibodies against HA. Results shown are mean and SD from triplicate transfected cultures for each condition, and each experiment shown is representative of three or more independent experiments performed on different days. D, CV-1 cells in 12-well dishes were transfected with MMTV(ERE) LUC reporter plasmid (200 ng) and expression vectors encoding ER $\alpha$  (2 ng); GRIP1 (50 ng); and mG9a full length (100 or 200 ng) or mG9a 1-333 (50 or 100 ng) as indicated. Cells were grown in the presence or absence of E2 for 48 h before measurement of luciferase activity. Results shown are mean and SD from triplicate transfected cultures for each condition, and each experiment shown is representative of two or more independent experiments performed on different days.

## Supplementary figure 3

```
1      10      20      30      40      50      60      70      80      90      100
hG9a  -----MAAAAGAAAAAAEAGEAPAEMGALLLEKETRGATERVHGS LGD
mG9a  MRGLPRGRGLMRARGRGRAAPTGGRRGRGRGGAHRGRGRPRSLLSLPRAQASWAPQLPAGLTGPPVPCLPSQGEAPAEMGALLLEKEPRGAAERVHSSLGD
101    110    120    130    140    150    160    170    180    190    200
TPRSEETLPKATPDSLEPAGPSSPASVTVTVGDEGADTPVGATPLIGDESENLEGDGLRGGRIILLGHATKSFPPSSPSKGGSCPSRAKMSMTGAGKSPPS
TPQSEETLPKANPDSLEPAGPSSPASVTVTVGDEGADTPVGAASLIGDEPESLEGD---GGRIVLGHATKSFPPSSPSKGGACPSRAKMSMTGAGKSPPS
201    210    220    230    240    250    260    270    280    290    300
VQSLAMRLLSMPGAQGAAAAGSEPPATTSP-EGQPKVHRARKTMSKPCNGQPPVPEKRPPEIQHFRMSDDVHSLGKVTSDLAKRRKLNSSGGGLSEELGS
VQSLAMRLLSMPGAQGAATAGPEPSPATTAAQEGQPKVHRARKTMSKPSNGQPPVPEKRPPEVQHFRMSDDMH-LGKVTSDVAKRRKLNSSGS-LSEDLGS
301    310    320    330
ARRSGEVILTKGDPGSLEEWETVVGDDFSLYYDS
AGSGSDIILEKGEPRPLEEWETVVGDDFSLYYDA
```

SUPPLEMENTARY FIGURE 3. **Amino acid homology of the N-terminal regions of mouse and human G9a.** The N-terminal mouse and human G9a sequences are aligned, and identical amino acids are indicated in the shaded areas.

## Supplementary Figure 4

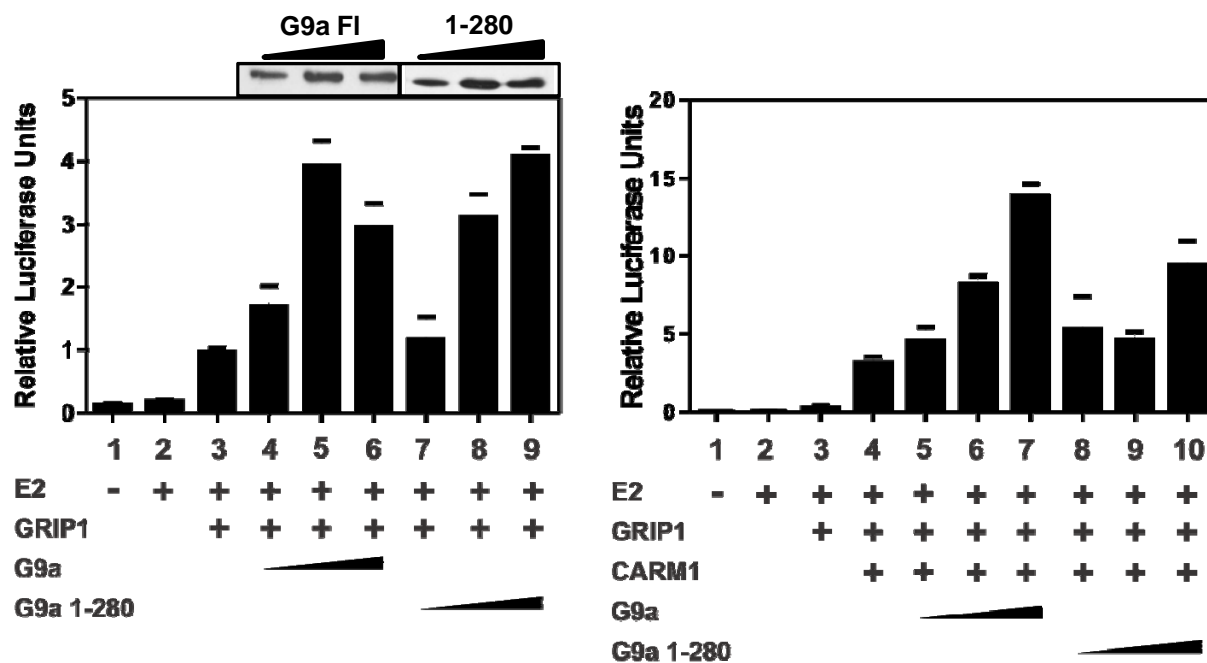

SUPPLEMENTARY FIGURE 4. **Coactivator activity of the N-terminal region of hG9a.** *A*, CV-1 cells in 12-well dishes were transfected with MMTV(ERE) LUC reporter plasmid (200 ng) and expression vectors encoding ER $\alpha$  (0.2 ng); GRIP1 (100 ng); and HA-tagged hG9a full length (FI) (50, 100, or 200 ng) or hG9a 1-280 (20, 50, or 100, ng). Cells were grown in the presence or absence of E2 for 48 h before measurement of luciferase activity and immunoblot analysis with antibodies against HA. Results shown are mean and SD from triplicate transfected cultures for each condition, and each experiment shown is representative of two independent experiments performed on different days. *B*, Transfections and luciferase assays were performed as in *A*, except that plasmid amounts were: ER $\alpha$  (0.02 ng); GRIP1 (100 ng); CARM1 (200 ng); HA-tagged hG9a full length (50, 100, or 200 ng) or hG9a 1-280 (20, 50, or 100 ng).

# Supplementary figure 5

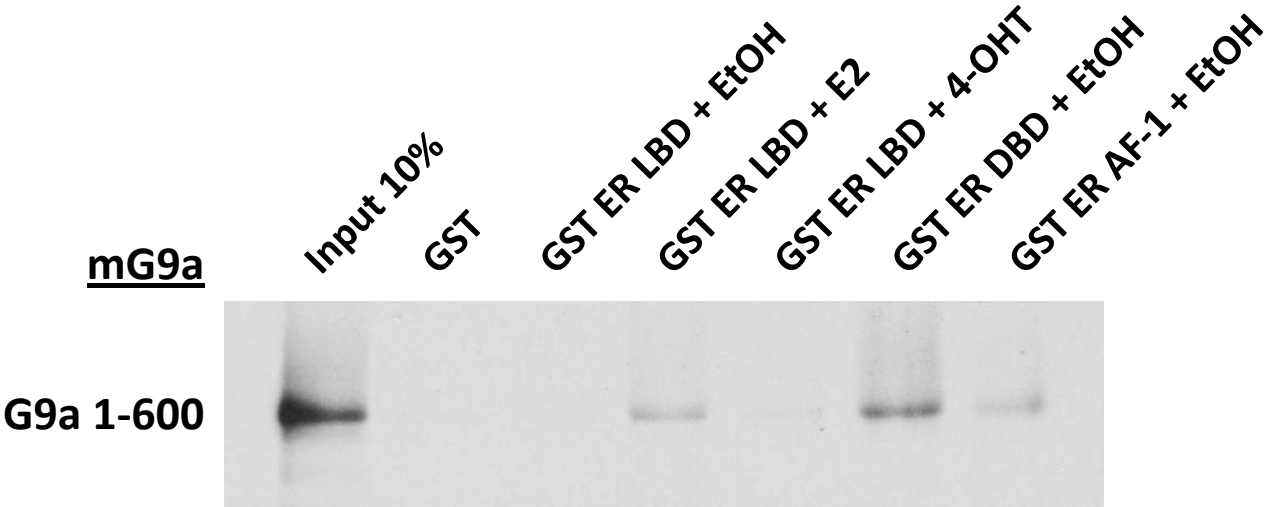

SUPPLEMENTARY FIGURE 5. **Binding of G9a to various domains of ER $\alpha$ .** GST pull-down assays were performed as in Fig. 6, using bead-bound GST fusion proteins encoding the indicated regions of ER $\alpha$  (1).

**SUPPLEMENTARY TABLE 1. Primers for PCR.**qRT-PCR

## pS2

5'-GAACAAGGTGATCTGCG-3' (forward)

5'-TGGTATTAGGATAGAAGCACCA-3' (reverse)

## pS2 pre-mRNA

5'-ACCATGGAGAACAAGGTGATC-3' (forward)

5'-TAAACAGTGGCTCCTGGCG-3' (reverse)

## GREB1

5'-CAAAGAATAACCTGTTGGCCCTGC-3' (forward)

5'-GACATGCCTGCGCTCTCATACTTA-3' (reverse)

## GREB1 pre-mRNA

5'-GATAAAAGCAACGTGCGTCTC-3' (forward)

5'-TCTTGCACAATTCCATCGAG-3' (reverse)

## CathepsinD

5'-GTACATGATCCCCTGTGAGAAGGT-3' (forward)

5'-GTCACCGGAGTCCATCACGATG-3' (reverse)

## SGK3

5'-TGAGGCCAGGAGTGAGTCTT-3' (forward)

5'-TATCATCTGGTCCAGCAACA-3' (reverse)

## c-Myc

5'-CTCTCAACGACAGCAGCTCG-3' (forward)

5'-CAACATCGATTTCTTCCTCATCTTC-3' (reverse)

## PKIB

5'-CCAATTTTGCATCTTCAGCA-3' (forward)

5'-GGCTTTTCCAATTGGTCTTG-3' (reverse)

## CyclinD1

5'-AAGCTCAAGTGGAACCT-3' (forward)

5'-AGGAAGTTGTTGGGGC-3' (reverse)

## CyclinD1 pre-mRNA

5'-CCTACTTCAAATGTGTGCAGAAG-3' (forward)

5'-CAACAAGTTGCAGGGAAGTC-3' (reverse)

## CXCL12

5'-TCAGCCTGAGCTACAGATGC-3' (forward)

5'-CTTTAGCTTCGGGTCAATGC-3' (reverse)

## b-actin

5'-ACCCCATCGAGCACGGCATCG-3' (forward)

5'-GTCACCGGAGTCCATCACGATG-3' (reverse)

## GAPDH

5'-TCTGGTAAAGTGGATATTGTTG-3' (forward)

5'-GATGGTGATGGGATTTCC-3' (reverse)

## PGR

5'-GTG CCT ATC CTG CCT CTC AAT C-3' (forward)

5'-CCC GCC GTC GTA ACT TTC G-3' (reverse)

## PGR pre-mRNA

5'-CAG GTC TAC CCG CCC TAT CT-3' (forward)

5'-TAT ATT CTG CGC CCA CCT TC-3' (reverse)

## G9a

5'-ATGGGTGAAGCCGTCTCGGA-3' (forward)

5'-ATCTTGGGTGCCTCCATGCG-3' (reverse)

qPCR

Primers for Q-PCR analysis of ChIP assays were previously described for pS2 (2) and GREB1 (3)

## SUPPLEMENTARY REFERENCES

1. Sadovsky, Y., Webb, P., Lopez, G., Baxter, J. D., Fitzpatrick, P. M., Gizang-Ginsberg, E., Cavailles, V., Parker, M.G., and Kushner, P. J. (1995) *Mol. Cell. Biol.* **15**, 1554-1563
2. Pan, Y. F., Wansa, K. D., Liu, M. H., Zhao, B., Hong, S. Z., Tan, P. Y., Lim, K. S., Bourque, G., Liu, E. T., and Cheung, E. (2008) *J Biol Chem* **283**, 32977-32988
3. Sun, J., Nawaz, Z., and Slingerland, J. M. (2007) *Mol Endocrinol* **21**, 2651-2662
